# Supplementary material
Source: MDPI journal article supplement (https://www.mdpi.com/2071-1050/14/12/7403)
Supplement: s1 [file s1]

## Supplementary Material

**Table S1: The used database**

| Hc           | C     | Cc    | Cu    | $\gamma_{\text{unsat}}$ | Ip    | Er      |
|--------------|-------|-------|-------|-------------------------|-------|---------|
| -            | -     | -     | -     | (g/cm <sup>3</sup> )    | -     | (g/sec) |
| Training set |       |       |       |                         |       |         |
| 0.067        | 0.235 | 1.470 | 4.370 | 1.720                   | 0.297 | 0.128   |
| 0.065        | 0.235 | 1.460 | 4.280 | 1.710                   | 0.300 | 0.128   |
| 0.104        | 0.239 | 1.770 | 5.410 | 2.005                   | 0.193 | 0.090   |
| 0.064        | 0.235 | 1.455 | 4.200 | 1.705                   | 0.302 | 0.128   |
| 0.093        | 0.238 | 1.670 | 4.980 | 1.850                   | 0.220 | 0.119   |
| 0.117        | 0.240 | 1.880 | 5.820 | 2.060                   | 0.155 | 0.061   |
| 0.080        | 0.237 | 1.560 | 4.880 | 1.785                   | 0.260 | 0.126   |
| 0.079        | 0.237 | 1.550 | 4.840 | 1.780                   | 0.261 | 0.125   |
| 0.035        | 0.232 | 1.240 | 2.410 | 1.560                   | 0.380 | 0.143   |
| 0.078        | 0.236 | 1.540 | 4.800 | 1.775                   | 0.264 | 0.125   |
| 0.055        | 0.234 | 1.410 | 3.650 | 1.660                   | 0.320 | 0.131   |
| 0.021        | 0.231 | 1.070 | 2.220 | 1.492                   | 0.410 | 0.155   |
| 0.047        | 0.233 | 1.350 | 3.310 | 1.620                   | 0.347 | 0.137   |
| 0.008        | 0.231 | 0.930 | 2.100 | 1.435                   | 0.433 | 0.170   |
| 0.028        | 0.232 | 1.170 | 2.280 | 1.525                   | 0.404 | 0.148   |
| 0.003        | 0.230 | 0.870 | 2.060 | 1.415                   | 0.447 | 0.190   |
| 0.050        | 0.234 | 1.380 | 3.450 | 1.635                   | 0.340 | 0.135   |
| 0.099        | 0.239 | 1.720 | 5.200 | 1.880                   | 0.211 | 0.111   |
| 0.083        | 0.237 | 1.590 | 4.640 | 1.799                   | 0.247 | 0.123   |
| 0.089        | 0.238 | 1.640 | 4.830 | 1.830                   | 0.223 | 0.120   |
| 0.012        | 0.231 | 0.970 | 2.160 | 1.451                   | 0.418 | 0.165   |
| 0.037        | 0.233 | 1.250 | 2.430 | 1.570                   | 0.377 | 0.141   |
| 0.096        | 0.238 | 1.690 | 5.100 | 1.865                   | 0.217 | 0.113   |
| 0.076        | 0.236 | 1.520 | 4.710 | 1.765                   | 0.269 | 0.125   |
| 0.048        | 0.234 | 1.360 | 3.360 | 1.625                   | 0.345 | 0.136   |
| 0.026        | 0.232 | 1.130 | 2.270 | 1.514                   | 0.408 | 0.150   |
| 0.031        | 0.232 | 1.210 | 2.300 | 1.538                   | 0.396 | 0.146   |
| 0.108        | 0.240 | 1.800 | 5.570 | 2.025                   | 0.176 | 0.083   |
| 0.007        | 0.231 | 0.920 | 2.090 | 1.431                   | 0.437 | 0.173   |
| 0.002        | 0.230 | 0.860 | 2.060 | 1.414                   | 0.448 | 0.193   |
| 0.036        | 0.232 | 1.250 | 2.420 | 1.565                   | 0.379 | 0.145   |
| 0.060        | 0.235 | 1.430 | 3.920 | 1.685                   | 0.310 | 0.131   |
| 0.119        | 0.241 | 1.930 | 5.850 | 2.068                   | 0.144 | 0.058   |
| 0.068        | 0.235 | 1.475 | 4.430 | 1.725                   | 0.297 | 0.128   |
| 0.100        | 0.239 | 1.730 | 5.240 | 1.884                   | 0.210 | 0.108   |
| 0.058        | 0.234 | 1.420 | 3.800 | 1.675                   | 0.315 | 0.131   |
| 0.009        | 0.231 | 0.940 | 2.120 | 1.439                   | 0.426 | 0.168   |
| 0.001        | 0.230 | 0.850 | 2.050 | 1.410                   | 0.450 | 0.198   |
| 0.000        | 0.230 | 0.840 | 2.050 | 1.400                   | 0.450 | 0.201   |
| 0.109        | 0.240 | 1.810 | 5.600 | 2.028                   | 0.171 | 0.079   |
| 0.070        | 0.236 | 1.484 | 4.510 | 1.735                   | 0.290 | 0.126   |
| 0.041        | 0.233 | 1.300 | 2.640 | 1.590                   | 0.367 | 0.140   |
| 0.073        | 0.236 | 1.510 | 4.630 | 1.750                   | 0.278 | 0.125   |
| 0.034        | 0.232 | 1.240 | 2.360 | 1.555                   | 0.384 | 0.143   |
| 0.102        | 0.239 | 1.750 | 5.340 | 1.995                   | 0.204 | 0.100   |
| 0.017        | 0.231 | 1.030 | 2.200 | 1.474                   | 0.413 | 0.160   |
| 0.030        | 0.232 | 1.190 | 2.300 | 1.532                   | 0.400 | 0.146   |
| 0.044        | 0.233 | 1.330 | 2.960 | 1.605                   | 0.352 | 0.136   |
| 0.052        | 0.234 | 1.390 | 3.510 | 1.645                   | 0.334 | 0.131   |
| 0.018        | 0.231 | 1.040 | 2.200 | 1.478                   | 0.412 | 0.158   |
| 0.020        | 0.231 | 1.060 | 2.210 | 1.488                   | 0.410 | 0.156   |
| 0.074        | 0.236 | 1.510 | 4.670 | 1.755                   | 0.274 | 0.125   |
| 0.016        | 0.231 | 1.020 | 2.200 | 1.469                   | 0.414 | 0.161   |
| 0.090        | 0.238 | 1.650 | 4.890 | 1.835                   | 0.220 | 0.120   |
| 0.066        | 0.235 | 1.460 | 4.320 | 1.715                   | 0.297 | 0.130   |
| 0.082        | 0.237 | 1.580 | 4.600 | 1.795                   | 0.253 | 0.125   |
| 0.098        | 0.238 | 1.710 | 5.170 | 1.875                   | 0.214 | 0.111   |
| 0.033        | 0.232 | 1.230 | 2.320 | 1.550                   | 0.388 | 0.145   |
| 0.087        | 0.237 | 1.620 | 4.790 | 1.820                   | 0.234 | 0.121   |

|                |       |       |       |       |       |       |
|----------------|-------|-------|-------|-------|-------|-------|
| 0.059          | 0.235 | 1.425 | 3.870 | 1.680 | 0.314 | 0.130 |
| 0.029          | 0.232 | 1.180 | 2.290 | 1.529 | 0.402 | 0.148 |
| 0.105          | 0.239 | 1.780 | 5.440 | 2.010 | 0.190 | 0.086 |
| 0.071          | 0.236 | 1.490 | 4.540 | 1.739 | 0.285 | 0.127 |
| 0.023          | 0.232 | 1.090 | 2.240 | 1.500 | 0.410 | 0.151 |
| 0.088          | 0.237 | 1.630 | 4.800 | 1.825 | 0.227 | 0.121 |
| 0.013          | 0.231 | 0.980 | 2.180 | 1.456 | 0.417 | 0.161 |
| 0.101          | 0.239 | 1.740 | 5.280 | 1.889 | 0.208 | 0.106 |
| 0.057          | 0.234 | 1.420 | 3.760 | 1.670 | 0.317 | 0.131 |
| 0.097          | 0.238 | 1.700 | 5.130 | 1.870 | 0.216 | 0.113 |
| 0.039          | 0.233 | 1.270 | 2.520 | 1.580 | 0.373 | 0.138 |
| 0.019          | 0.231 | 1.050 | 2.210 | 1.483 | 0.411 | 0.158 |
| 0.077          | 0.236 | 1.530 | 4.750 | 1.770 | 0.264 | 0.125 |
| 0.107          | 0.239 | 1.790 | 5.530 | 2.020 | 0.185 | 0.085 |
| 0.056          | 0.234 | 1.410 | 3.700 | 1.665 | 0.319 | 0.131 |
| 0.040          | 0.233 | 1.280 | 2.590 | 1.585 | 0.370 | 0.140 |
| 0.022          | 0.232 | 1.080 | 2.230 | 1.496 | 0.410 | 0.153 |
| 0.049          | 0.234 | 1.370 | 3.400 | 1.630 | 0.343 | 0.136 |
| 0.042          | 0.233 | 1.310 | 2.740 | 1.595 | 0.362 | 0.138 |
| 0.038          | 0.233 | 1.270 | 2.450 | 1.574 | 0.376 | 0.140 |
| 0.072          | 0.236 | 1.500 | 4.590 | 1.745 | 0.282 | 0.126 |
| 0.095          | 0.238 | 1.680 | 5.060 | 1.860 | 0.220 | 0.116 |
| Validation set |       |       |       |       |       |       |
| 0.063          | 0.235 | 1.450 | 4.150 | 1.699 | 0.304 | 0.130 |
| 0.010          | 0.231 | 0.950 | 2.140 | 1.443 | 0.420 | 0.165 |
| 0.032          | 0.232 | 1.220 | 2.310 | 1.544 | 0.395 | 0.145 |
| 0.075          | 0.236 | 1.520 | 4.700 | 1.760 | 0.270 | 0.125 |
| 0.112          | 0.240 | 1.850 | 5.690 | 2.040 | 0.166 | 0.071 |
| 0.069          | 0.236 | 1.480 | 4.480 | 1.731 | 0.293 | 0.127 |
| 0.005          | 0.230 | 0.890 | 2.070 | 1.424 | 0.440 | 0.180 |
| 0.111          | 0.240 | 1.840 | 5.660 | 2.036 | 0.168 | 0.075 |
| 0.091          | 0.238 | 1.650 | 4.920 | 1.840 | 0.220 | 0.120 |
| 0.085          | 0.237 | 1.610 | 4.720 | 1.809 | 0.240 | 0.121 |
| 0.084          | 0.237 | 1.600 | 4.690 | 1.805 | 0.243 | 0.123 |
| 0.006          | 0.231 | 0.910 | 2.080 | 1.428 | 0.440 | 0.175 |
| 0.053          | 0.234 | 1.390 | 3.540 | 1.650 | 0.327 | 0.131 |
| 0.094          | 0.238 | 1.670 | 5.010 | 1.855 | 0.220 | 0.118 |
| 0.054          | 0.234 | 1.400 | 3.580 | 1.655 | 0.323 | 0.131 |
| 0.045          | 0.233 | 1.330 | 3.200 | 1.610 | 0.350 | 0.136 |
| 0.115          | 0.240 | 1.870 | 5.790 | 2.052 | 0.160 | 0.061 |
| 0.086          | 0.237 | 1.610 | 4.760 | 1.815 | 0.238 | 0.121 |
| 0.106          | 0.239 | 1.780 | 5.480 | 2.015 | 0.188 | 0.083 |
| 0.118          | 0.241 | 1.890 | 5.530 | 2.064 | 0.148 | 0.061 |
| 0.114          | 0.240 | 1.870 | 5.760 | 2.048 | 0.162 | 0.066 |
| 0.062          | 0.235 | 1.435 | 4.080 | 1.695 | 0.307 | 0.130 |
| 0.113          | 0.240 | 1.860 | 5.720 | 2.044 | 0.164 | 0.068 |
| 0.004          | 0.230 | 0.880 | 2.060 | 1.420 | 0.445 | 0.185 |
| 0.011          | 0.231 | 0.960 | 2.150 | 1.447 | 0.419 | 0.165 |
| 0.103          | 0.239 | 1.760 | 5.380 | 2.000 | 0.197 | 0.095 |
| 0.024          | 0.232 | 1.100 | 2.250 | 1.504 | 0.410 | 0.150 |
| 0.043          | 0.233 | 1.310 | 2.820 | 1.600 | 0.356 | 0.138 |
| 0.110          | 0.240 | 1.830 | 5.630 | 2.032 | 0.170 | 0.078 |
| 0.120          | 0.241 | 1.960 | 5.860 | 2.072 | 0.140 | 0.058 |
| 0.051          | 0.234 | 1.380 | 3.490 | 1.640 | 0.338 | 0.133 |
| 0.027          | 0.232 | 1.150 | 2.270 | 1.519 | 0.406 | 0.148 |
| 0.025          | 0.232 | 1.120 | 2.260 | 1.509 | 0.410 | 0.150 |
| 0.092          | 0.238 | 1.660 | 4.940 | 1.845 | 0.220 | 0.119 |
| 0.014          | 0.231 | 0.990 | 2.190 | 1.460 | 0.416 | 0.160 |
| 0.116          | 0.240 | 1.880 | 5.820 | 2.056 | 0.159 | 0.061 |
| 0.015          | 0.231 | 1.000 | 2.190 | 1.465 | 0.415 | 0.160 |
| 0.081          | 0.237 | 1.570 | 4.560 | 1.790 | 0.258 | 0.125 |
| 0.046          | 0.233 | 1.350 | 3.270 | 1.615 | 0.348 | 0.137 |
| 0.061          | 0.235 | 1.430 | 3.980 | 1.690 | 0.308 | 0.130 |
